# Supplementary material
Source: PubMed Central journal article supplement (PMC6026579)
Supplement: NIHMS926241-supplement-supplement_1.pdf [file NIHMS926241-supplement-supplement_1.pdf]

**eTable 1: Hormone correlations in the entire group and within each sex**

|            |              | All subjects             | Women                   | Men                  |
|------------|--------------|--------------------------|-------------------------|----------------------|
| N          |              | 163                      | 91                      | 72                   |
| Leptin     | a-FABP       | <b>0.63 (&lt;0.001)</b>  | <b>0.66 (&lt;0.001)</b> | <b>0.42 (0.0002)</b> |
|            | 25(OH)VitD   | 0.03 (0.73)              | -0.03 (0.79)            | -0.19 (0.10)         |
|            | Testosterone | <b>-0.42 (&lt;0.001)</b> | <b>0.24 (0.02)</b>      | -0.21 (0.08)         |
| a-FABP     | 25(OH)VitD   | -0.01 (0.91)             | 0.01 (0.93)             | -0.20 (0.08)         |
|            | Testosterone | <b>-0.21 (0.008)</b>     | 0.07 (0.49)             | -0.19 (0.11)         |
| 25(OH)VitD | Testosterone | -0.13 (0.10)             | 0.12 (0.27)             | 0.03 (0.82)          |

Legend: Pearson's correlation coefficient (p-value) are presented for each pair of variables

In 135 individuals with body mass index (BMI, kg/m<sup>2</sup>) available, BMI was correlated with both leptin (r=0.56, p<0.0001) and a-FABP (r=0.51, p<0.0001).

25(OH)VitD: 25-hydroxy-vitamin D; a-FABP: adipocyte-fatty acid binding protein.

**eTable 2: Cross-sectional and longitudinal associations between adiposity markers and MS disability (EDSS), adjusted for age, BMI and disease characteristics.**

|                                                                                          | UNIVARIATE ASSOCIATIONS |                     |                       | MULTIVARIATE ASSOCIATIONS |                     |                       |
|------------------------------------------------------------------------------------------|-------------------------|---------------------|-----------------------|---------------------------|---------------------|-----------------------|
|                                                                                          | All subjects            | Women               | Men                   | All subjects              | Women               | Men                   |
| <b>Cross-sectional EDSS (N=135) – Odds ratio greater than 1 indicates worse function</b> |                         |                     |                       |                           |                     |                       |
| Adiposity Markers                                                                        |                         |                     |                       |                           |                     |                       |
| Leptin                                                                                   | 1.15 (0.28)             | 1.25 (0.30)         | 2.51 (0.067)          | -                         | -                   | -                     |
| a-FABP                                                                                   | <b>1.24 (0.046)</b>     | 1.28 (0.065)        | 1.27 (0.34)           | 1.22 (0.078)              | <b>1.32 (0.042)</b> | 1.13 (0.64)           |
| Additional markers                                                                       |                         |                     |                       |                           |                     |                       |
| 25(OH)VitD                                                                               | <b>0.64 (0.006)</b>     | <b>0.60 (0.017)</b> | 0.71 (0.18)           | <b>0.62 (0.003)</b>       | <b>0.57 (0.010)</b> | 0.69 (0.17)           |
| Testosterone                                                                             | 0.99 (0.22)             | 0.92 (0.47)         | <b>0.95 (0.006)</b>   | 0.99 (0.26)               | 0.99 (0.92)         | <b>0.94 (0.005)</b>   |
| <b>Longitudinal EDSS (N=135) – a positive value indicates worsening function</b>         |                         |                     |                       |                           |                     |                       |
| Adiposity Markers                                                                        |                         |                     |                       |                           |                     |                       |
| Leptin                                                                                   | -0.00002 (0.99)         | -0.0023 (0.41)      | -0.0057 (0.47)        |                           |                     |                       |
| a-FABP                                                                                   | 0.0024 (0.13)           | -0.00004 (0.98)     | <b>0.0091 (0.011)</b> | 0.0025 (0.13)             | -0.00009 (0.96)     | <b>0.0078 (0.023)</b> |
| Additional markers                                                                       |                         |                     |                       |                           |                     |                       |
| 25(OH)VitD                                                                               | -0.0015 (0.53)          | 0.0013 (0.61)       | <b>-0.012 (0.008)</b> | -0.0013 (0.60)            | 0.00052 (0.85)      | <b>-0.011 (0.017)</b> |
| Testosterone                                                                             | 0.00005 (0.97)          | 0.0040 (0.14)       | 0.00021 (0.50)        | 0.00004 (0.77)            | 0.0039 (0.16)       | 0.0004 (0.17)         |

**Legend:**

Cross-sectional analyses: Odds ratio for a ten-unit increase in each of the hormonal markers (p-value). Adjusted for BMI, age, disease duration and type.

Longitudinal analyses: Estimate and p-value of the association between hormonal markers and change in EDSS over time are provided. Adjusted for age, disease duration and type.

BMI: body mass index. EDSS: Expanded Disability Status Scale. 25(OH)VitD: 25-hydroxy-vitamin D; a-FABP: adipocyte-fatty acid binding protein.
